# Supplementary figures and images for: Mechanistic insights into the improved properties of mayonnaise from the changes in protein structures of enzymatic modification-treated egg yolk
Source: Royal Society of Chemistry journal article supplement (doi:10.1039/d2ra04244d), 2022-01-01

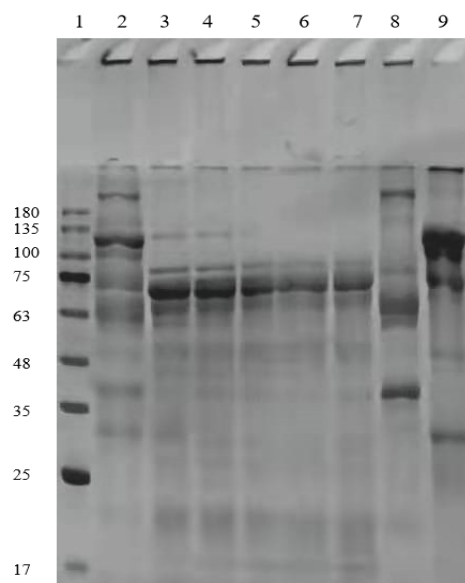

Supplement: d2ra04244d1.pdf [file d2ra04244d1.pdf]
